# Supplementary material for: Pulmonary artery smooth muscle cells with pulmonary arterial hypertension depends metabolism on glycolysis under normoxia and mitochondrial respiration under hypoxia
Source: Research Square preprint supplement (doi:10.21203/rs.3.rs-1844787/v1), 2022-07-28
Supplement: Supplementary file 1 [file 755a67c7adf0c1c62ac3f0d7.docx]

**Pulmonary artery smooth muscle cells with pulmonary arterial hypertension depends metabolism on glycolysis under normoxia and mitochondrial respiration under hypoxia**

Satoshi Akagi1*; Kazufumi Nakamura1; Megumi Kondo1; Satoshi Hirohata2; Heiichiro Udono3; Mikako Nishida3; Yukihiro Saito1; Masashi Yoshida1; Toru Miyoshi1; Hiroshi Ito1

1Department of Cardiovascular Medicine, Okayama University Graduate School of Medicine, Dentistry and Pharmaceutical Sciences, Okayama, Japan

2Department of Medical Technology, Graduate School of Health Sciences, Okayama University, Okayama, Japan

3Department of Immunology, Okayama University Graduate School of Medicine, Dentistry, and Pharmaceutical Sciences, Okayama, Japan

**Correspondence:** Satoshi Akagi. Department of Cardiovascular Medicine, Okayama University Graduate School of Medicine, Dentistry and Pharmaceutical Sciences, Okayama, Japan. E-mail: [akagi-s@cc.okayama-u.ac.jp](mailto:akagi-s@cc.okayama-u.ac.jp)


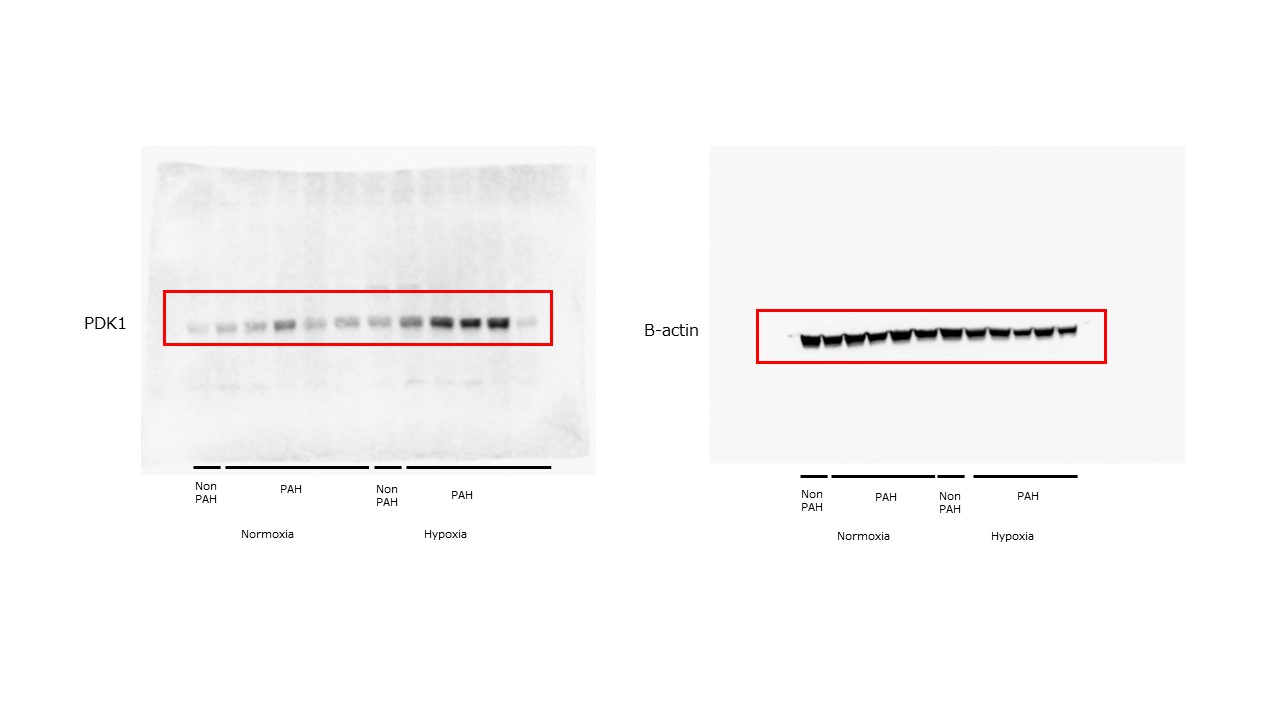


**Supplementary Figure S1.** Original western blot images used in Figure 1C.


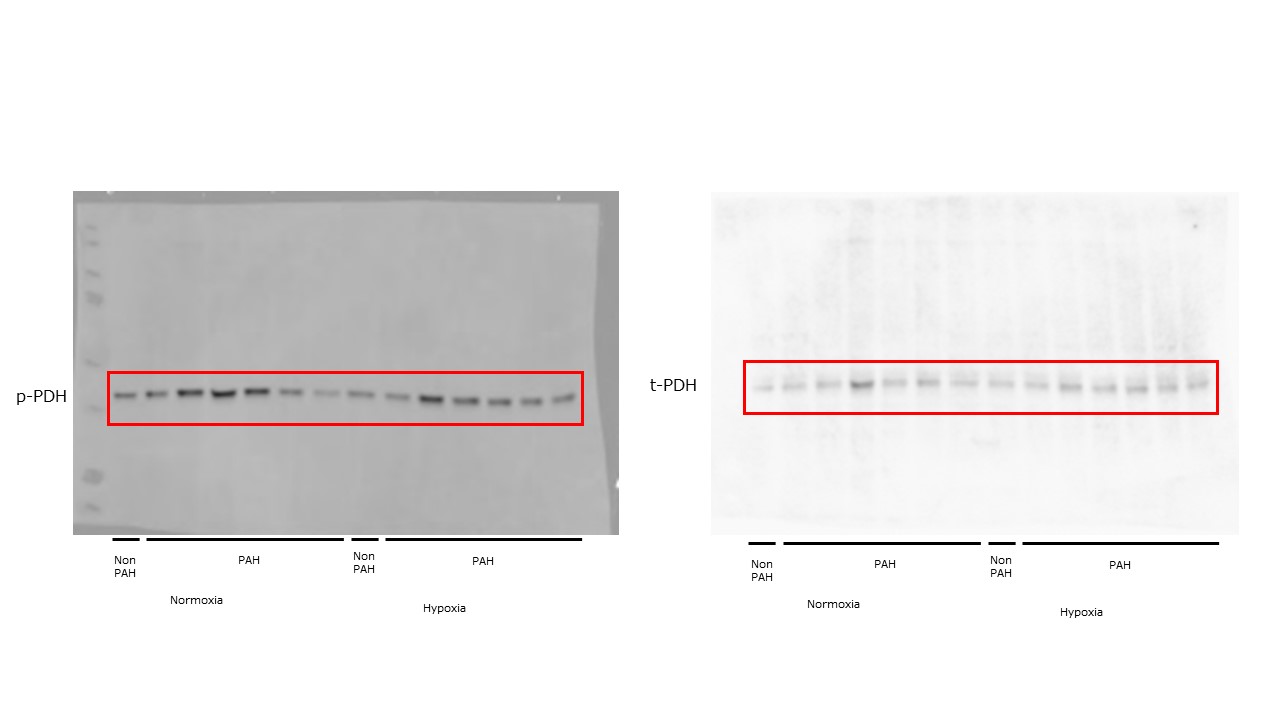


**Supplementary Figure S2.** Original western blot images used in Figure 1D.
